# Supplementary material for: Repeated, long-distance migrations by a philopatric predator targeting highly contrasting ecosystems
Source: PubMed Central journal article supplement (PMC4460898; doi:10.1038/srep11202), 2015-06-09
Supplement: srep11202-s1.pdf [file srep11202-s1.pdf]

1 **Supporting Information for:**

2

3 **Repeated, long-distance migrations by a philopatric predator targeting highly**

4 **contrasting ecosystems**

5 **by**

6 James S. E. Lea, Bradley M. Wetherbee, Nuno Queiroz, Neil Burnie, Choy Aming, Lara L.

7 Sousa, Gonzalo R. Mucientes, Nicolas E. Humphries, Guy M. Harvey, David W. Sims,

8 Mahmood S. Shivji

9

10 Figure S1: Frequency distribution of time between subsequent geolocations for all sharks.

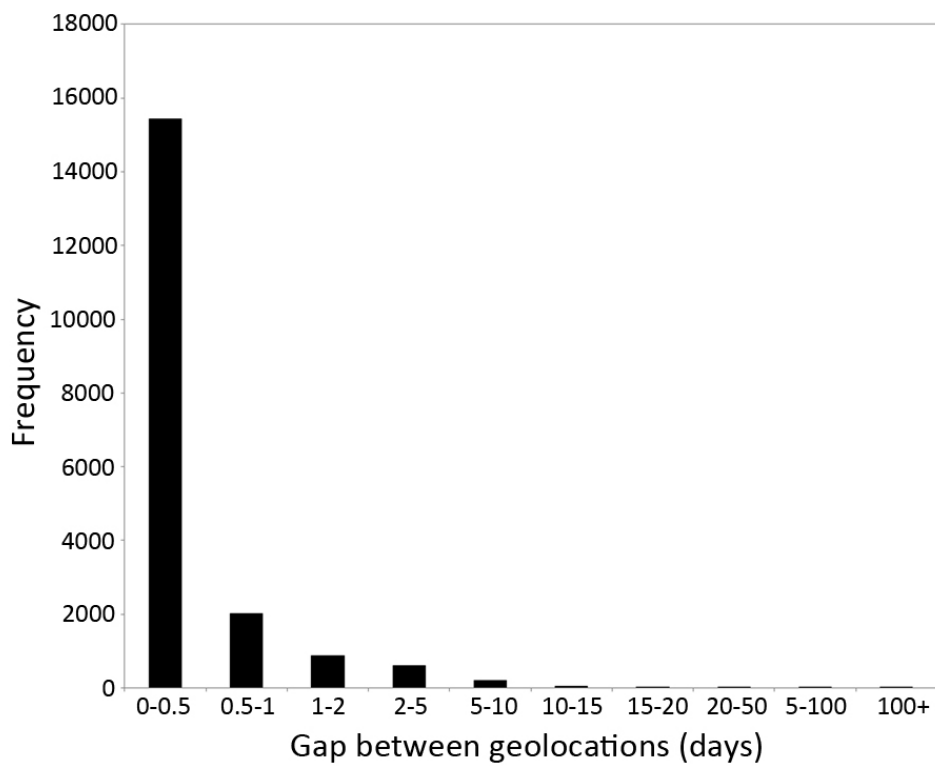

11

12

Figure S2: Maps to show how the positions varied between each stage of track processing for four different sharks (S7, large male; S12 small female; S15 small male; S16 large female): a = raw Argos positions, b = speed filtered positions, c = SSM positions, d = SSM positions with interpolation on data-less days, e = SSM positions with linear interpolation across gaps <20 days. Maps created in ArcGIS, using GSHHG coastline data and ETOPO2v2 bathymetry data.

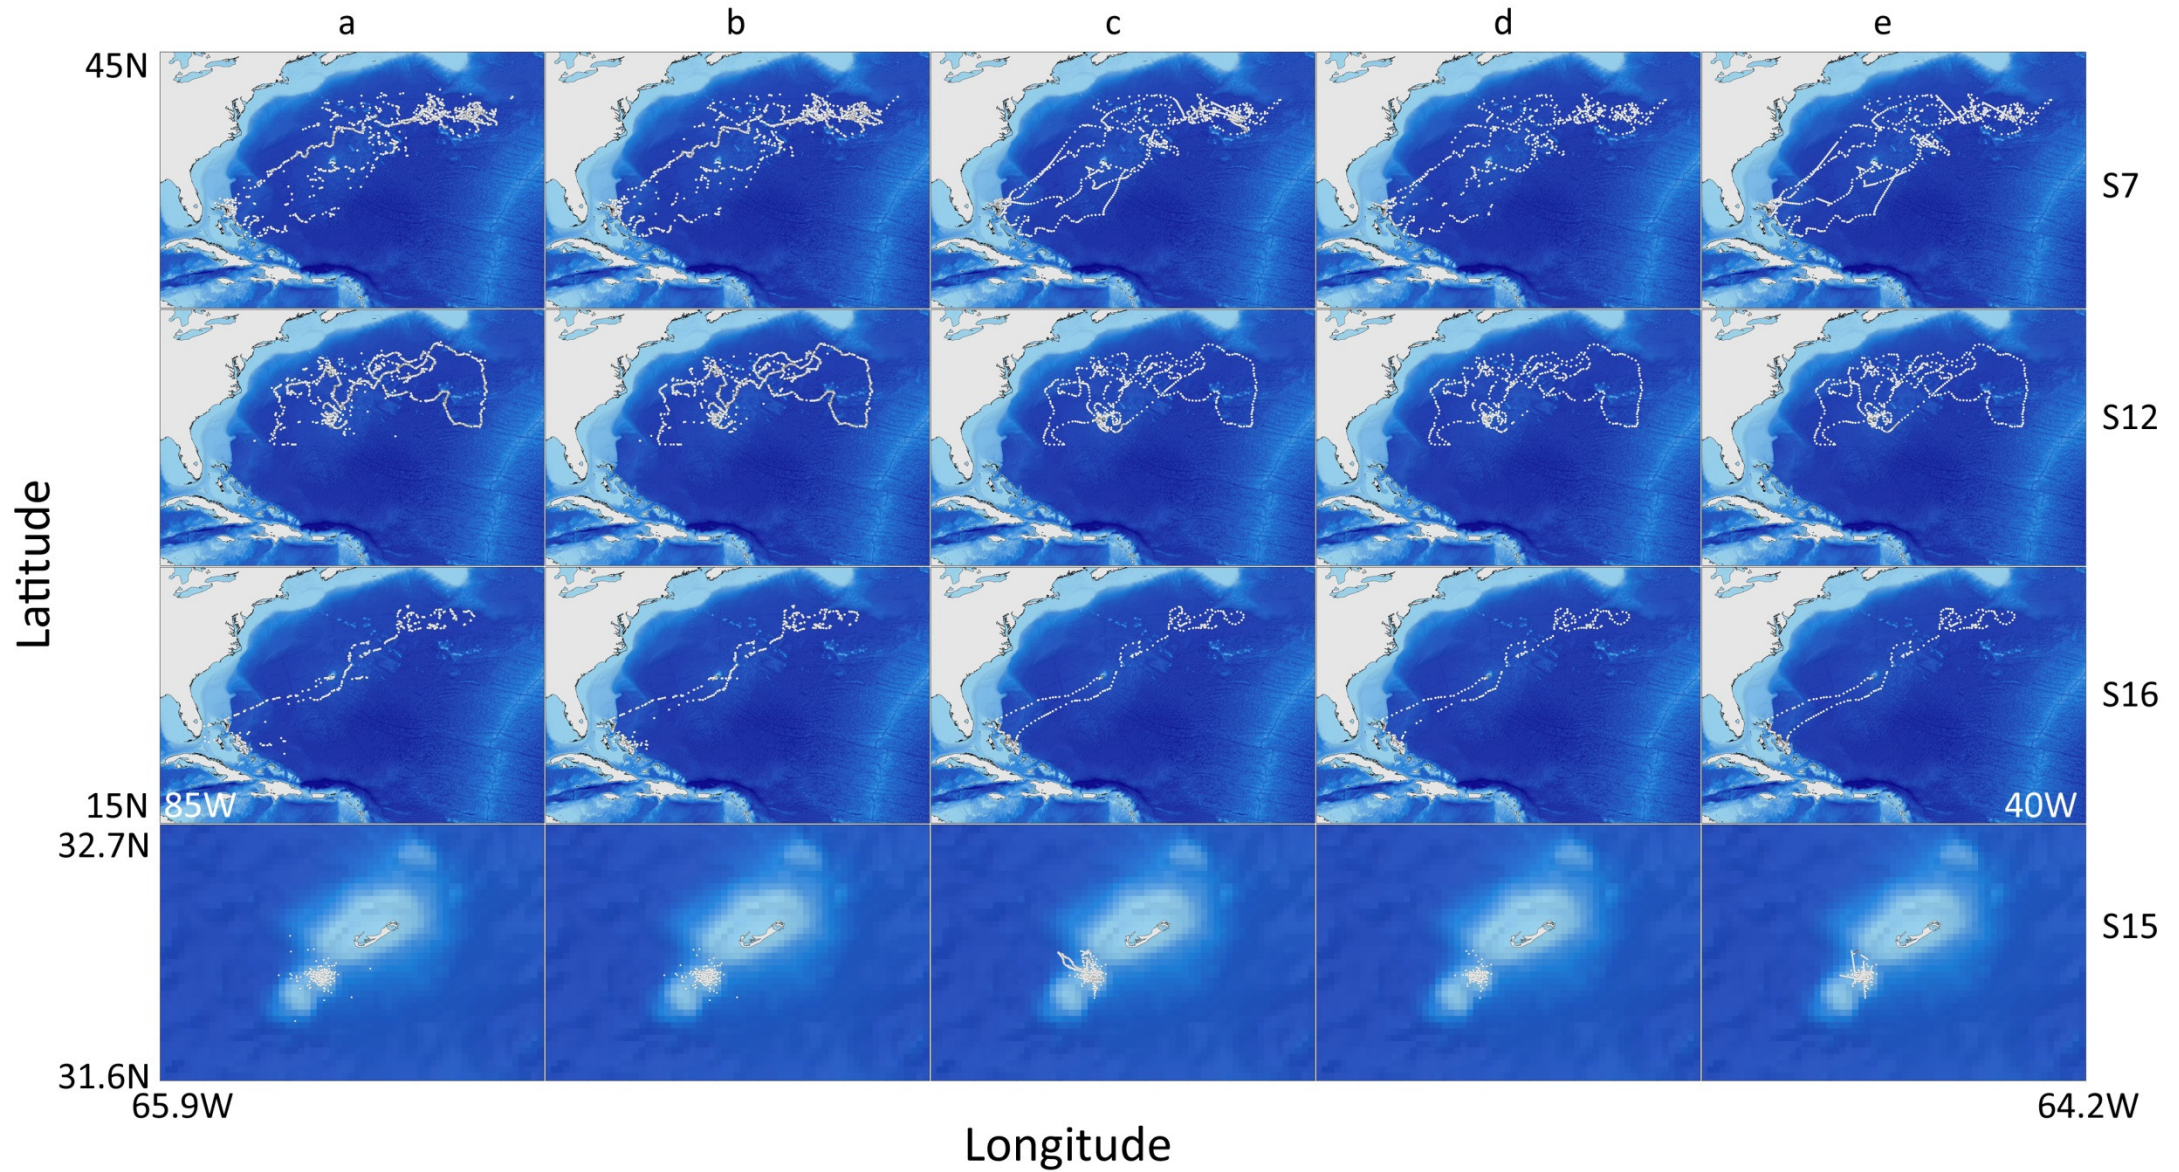

19 Table S1: Summary data for 24 tiger sharks tagged with SPOT5 transmitters at Challenger Bank,  
 20 Bermuda.

| ID | Sex | TL<br>(cm) | Date<br>tagged | Overall<br>Detection<br>Period (months) | Total<br>Locations | Minimum<br>distance<br>(km) | Minimum<br>distance/<br>month (km) |
|----|-----|------------|----------------|-----------------------------------------|--------------------|-----------------------------|------------------------------------|
| 1  | m   | 343        | 31-08-09       | 36.7                                    | 1163               | 42996                       | 1172                               |
| 2  | m   | 334        | 19-07-09       | 32.6                                    | 83                 | 9413                        | 289                                |
| 3  | m   | 313        | 02-08-09       | 26.9                                    | 401                | 10540                       | 392                                |
| 4  | m   | 361        | 29-07-10       | 25.8                                    | 1985               | 41158                       | 1597                               |
| 5  | m   | 244        | 28-07-10       | 25.6                                    | 94                 | 2431                        | 95                                 |
| 6  | m   | 295        | 03-08-09       | 24.9                                    | 1433               | 27723                       | 1113                               |
| 7  | m   | 384        | 11-09-10       | 24.9                                    | 2404               | 31677                       | 1274                               |
| 8  | m   | 371        | 07-09-10       | 24.8                                    | 809                | 26265                       | 1058                               |
| 9  | m   | 333        | 28-07-10       | 24.6                                    | 1871               | 25066                       | 1018                               |
| 10 | m   | 274        | 27-07-10       | 20.2                                    | 1628               | 19914                       | 986                                |
| 11 | m   | 330        | 25-07-10       | 18.6                                    | 928                | 25012                       | 1342                               |
| 12 | f   | 259        | 24-10-10       | 17.3                                    | 2352               | 19517                       | 1128                               |
| 13 | m   | 259        | 14-10-10       | 14.0                                    | 335                | 7725                        | 553                                |
| 14 | m   | 396        | 27-07-10       | 13.7                                    | 563                | 13081                       | 953                                |
| 15 | m   | 216        | 18-08-10       | 13.4                                    | 285                | 622                         | 46                                 |
| 16 | f   | 354        | 16-08-09       | 13.1                                    | 1263               | 12197                       | 933                                |
| 17 | m   | 346        | 05-08-09       | 13.0                                    | 312                | 15623                       | 1199                               |
| 18 | m   | 292        | 25-07-09       | 12.2                                    | 279                | 5200                        | 426                                |
| 19 | m   | 351        | 24-07-10       | 10.2                                    | 523                | 13083                       | 1287                               |
| 20 | f   | 173        | 21-11-11       | 7.2                                     | 452                | 1292                        | 179                                |
| 21 | m   | 305        | 28-07-10       | 5.9                                     | 19                 | 1624                        | 275                                |
| 22 | f   | 233        | 10-07-12       | 2.8                                     | 446                | 2224                        | 804                                |
| 23 | m   | 348        | 28-07-10       | 1.9                                     | 38                 | 1417                        | 759                                |
| 24 | m   | 323        | 05-09-10       | 1.4                                     | 49                 | 284                         | 208                                |

21

22

23 Figure S3: Mean monthly sea surface temperature (SST) for the northern and southern extents of the  
24 tracked sharks' range. Figure created using OSTIA SST data.

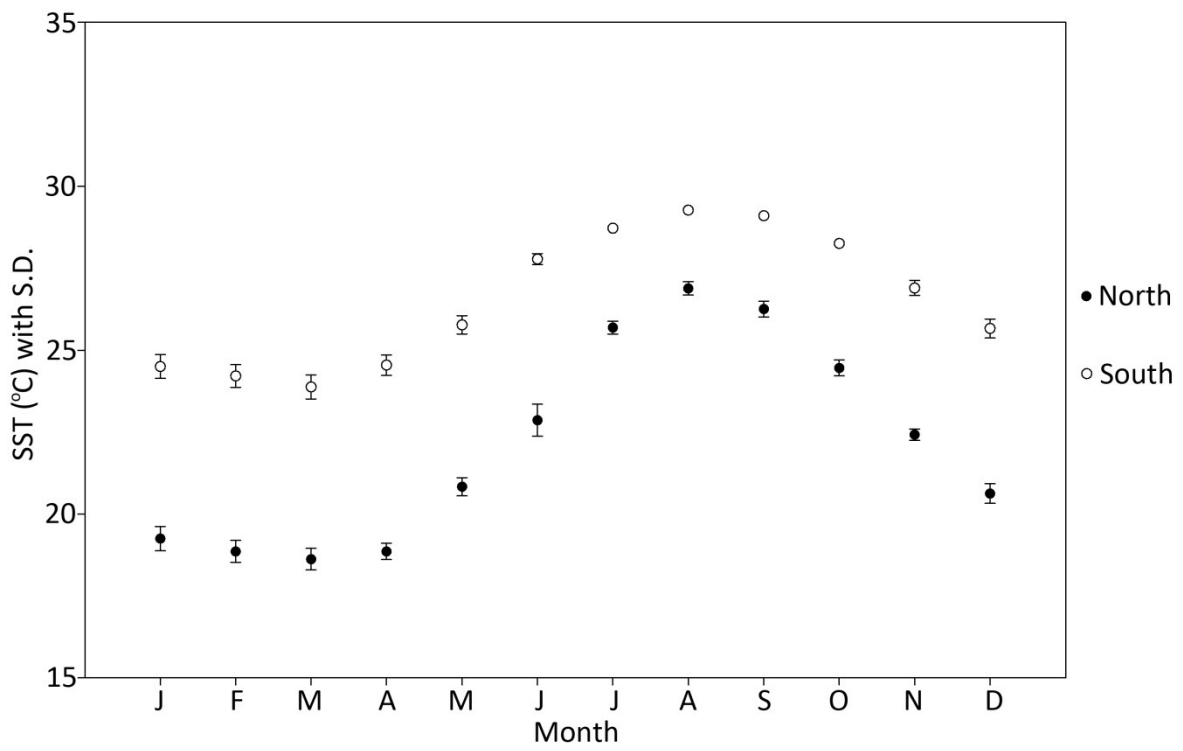

25

26

27 Figure S4: Maps of the overall occupancy (a) and mean straightness of movement (b) for all tiger  
28 sharks, overlaid on bathymetry. Maps created in ArcGIS, using GSHHG coastline data and  
29 ETOPO2v2 bathymetry data.

30

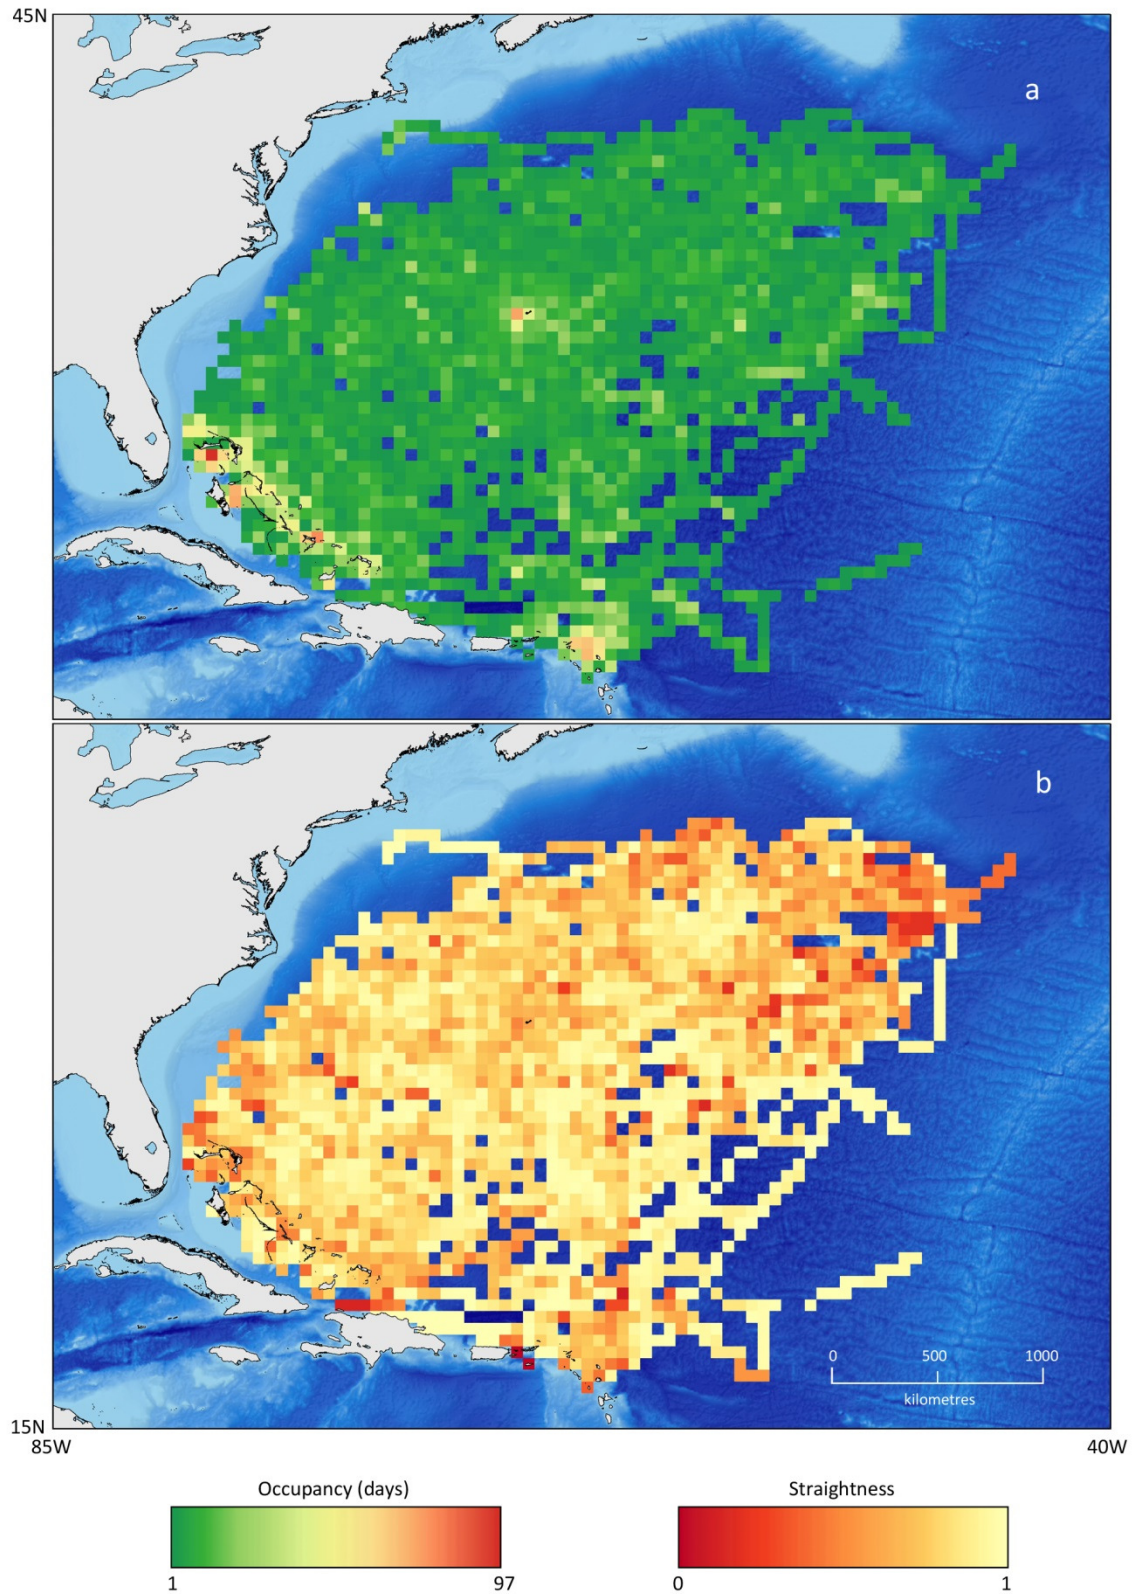

31 Figure S5: The occupancy and mean straightness of movement for shark 4 (361 cm male) for the first  
 32 and second year of its track (measured from tagging date). Maps created in ArcGIS, using  
 33 GSHHG coastline data and ETOPO2v2 bathymetry data.

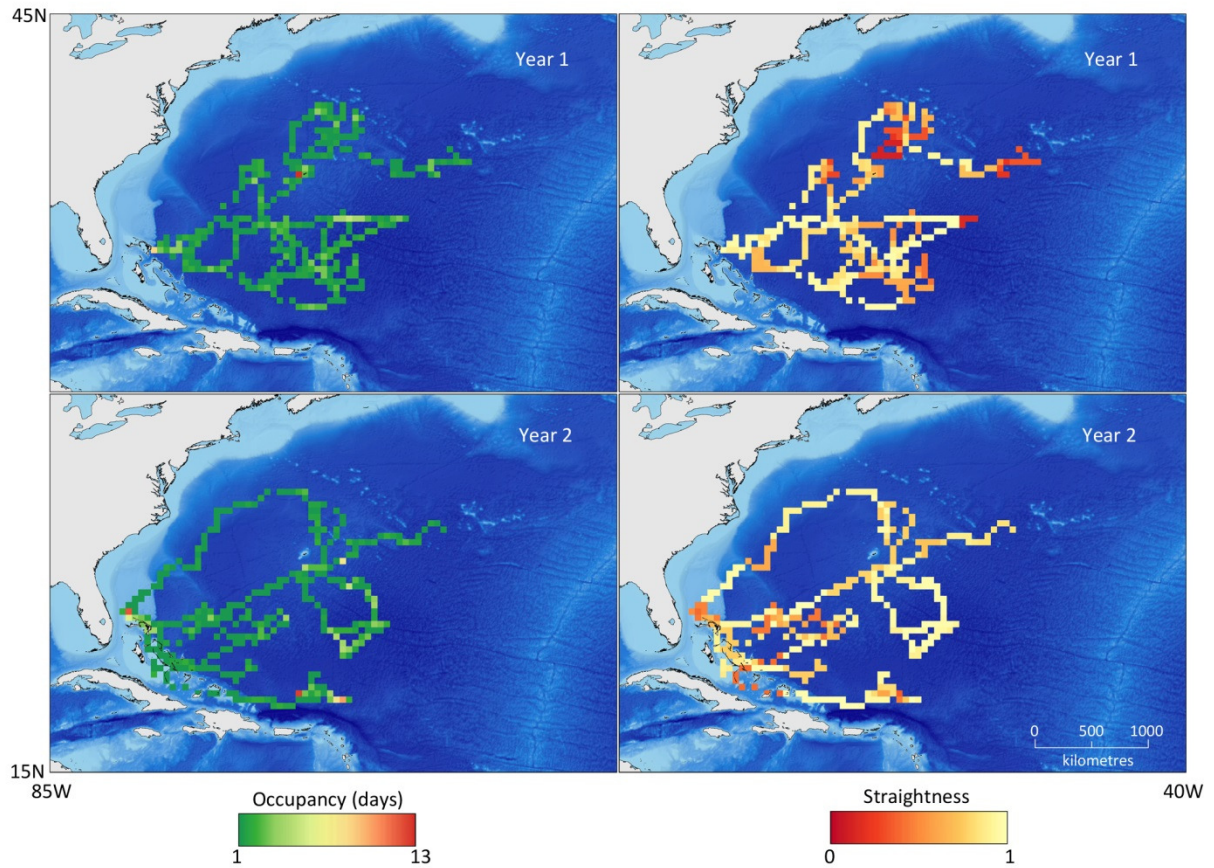

34

35

36 Table S2: Summary data of stomach contents from tiger sharks caught in the West Atlantic  
 37 by a commercial long liner.

| Shark | TL  | Sex | Date     | Lat   | Long   | Content (g) | <i>Caretta</i> % | Hydrobatidae % | <i>Balistes</i> % |
|-------|-----|-----|----------|-------|--------|-------------|------------------|----------------|-------------------|
| T1    | -   | -   | -        | 40    | -49    | 140.8       | 100.0            | -              | -                 |
| T2    | 246 | f   | 03-11-12 | 40.17 | -49.11 | 0.0         | -                | -              | -                 |
| T3    | 234 | m   | 01-11-12 | 41.09 | -48.14 | 200.8       | 66.1             | 0.5            | 33.9              |
| T4    | 223 | f   | 03-11-12 | 39.03 | -49.37 | 92.0        | 98.9             | 1.1            | -                 |
| T5    | -   | -   | -        | 40    | -49    | 156.8       | 100.0            | -              | -                 |

38

39 Figure S6: Overall mean straightness of movement in summer, overlaid with juvenile *Caretta*  
40 *caretta* summer locations from Mansfield *et al.* (2009) and tracks from McClellan and Read  
41 (2007), as well as catch locations of tiger sharks from which stomach contents were obtained.  
42 Map created in ArcGIS, using GSHHG coastline data and ETOPO2v2 bathymetry data.

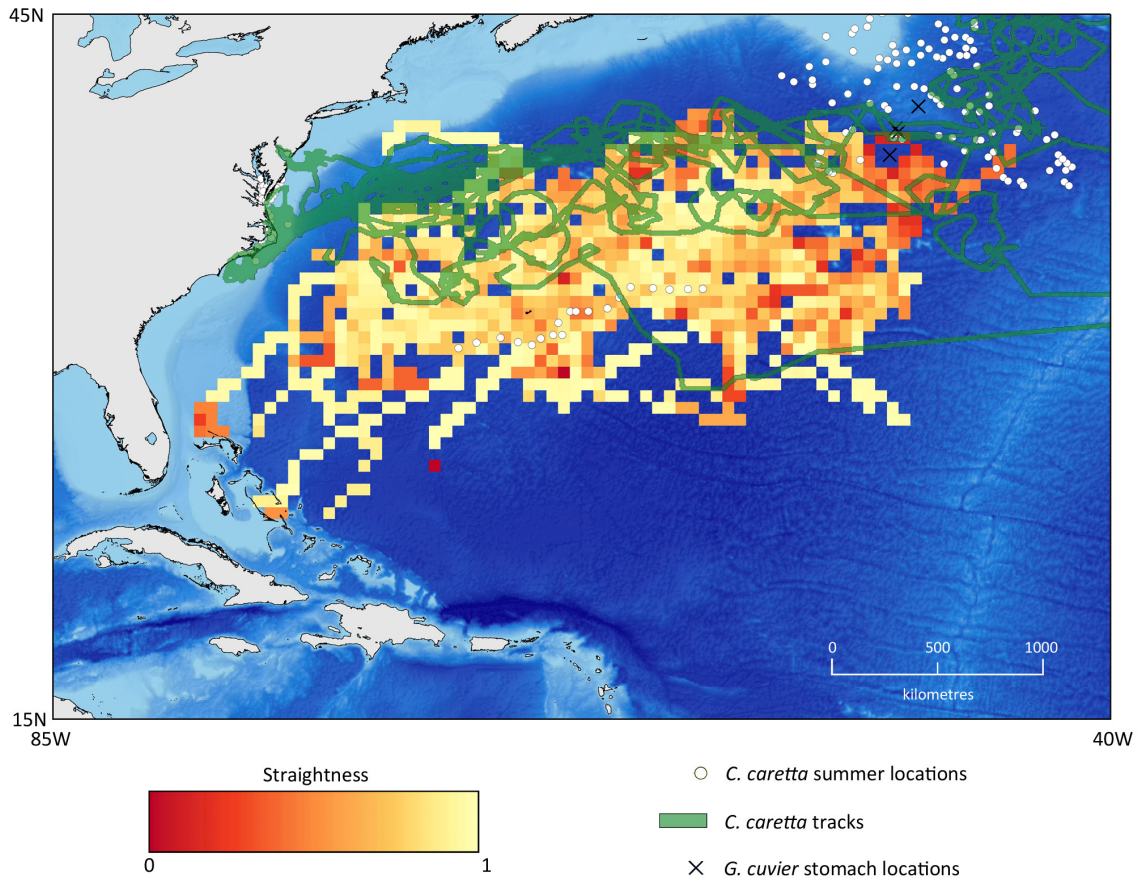

43
